# Supplementary material for: Molecular Structure, Vibrational Spectrum and Conformational Properties of 4-(4-Tritylphenoxy)phthalonitrile-Precursor for Synthesis of Phthalocyanines with Bulky Substituent
Source: MDPI journal article supplement (doi:10.3390/ijms232213922), 2022-11-11
Supplement: s1 [file s1]

## SUPPLEMENTARY MATERIALS

### Molecular structure, vibrational spectrum and conformational properties of 4-(4-tritylphenoxy)phthalonitrile - precursor for synthesis of phthalocyanines with bulky substituent

Natalia V. Tverdova <sup>1</sup>, Nina I. Giricheva <sup>2</sup>, Vladimir E. Maizlish <sup>3</sup>, Nikolay E. Galanin <sup>3</sup>, Georgiy V. Girichev <sup>1,\*</sup>

<sup>1</sup> Department of Physics, Ivanovo State University of Chemistry and Technology, Sheremetevsky Avenue 7, 153000 Ivanovo Russia

<sup>2</sup> Nanomaterial Research Institute, Ivanovo State University, Ermak street 39, 153025 Ivanovo, Russia

<sup>3</sup> Department of Fine Organic Chemistry and Technology, Ivanovo State University of Chemistry and Technology, Sheremetevsky Avenue 7, 153000 Ivanovo Russia

\* Correspondence: [g.v.girichev@mail.ru](mailto:g.v.girichev@mail.ru); [girichev@isuct.ru](mailto:girichev@isuct.ru)

#### Content

|                                                                                                                                                                                                                                 |    |
|---------------------------------------------------------------------------------------------------------------------------------------------------------------------------------------------------------------------------------|----|
| 1. <b>Section S1.</b> Synthesis and characterization of 4-(4-tritylphenoxy)phthalonitrile sample .....                                                                                                                          | 2  |
| 2. <b>Table S1.</b> Selected characteristics of 4-(4-tritylphenoxy)phthalonitrile molecule according to DFT calculations.....                                                                                                   | 6  |
| 3. <b>Table S2.</b> Relative Gibbs energies ( $\Delta G_{478}^0$ , kcal/mol), and molar fractions $\chi_i$ of conformers (mol%) in saturated vapor calculated for T=478K according to DFT calculations.....                     | 7  |
| 4. <b>Table S3.</b> Theoretical ( $\omega_{\text{theor}}$ ) vibrations frequencies of conformers and experimental ( $\nu_{\text{exp}}$ ) of 4-(4-tritylphenoxy)phthalonitrile. Nonscaled theoretical frequencies are given..... | 8  |
| 5. <b>Figure S1.</b> The calculated IR spectra of the conformers I and II ( <i>cis</i> ) and III and IV ( <i>trans</i> ).....                                                                                                   | 19 |
| 6. <b>Figure S2.</b> Theoretical molecular intensities $sM(s)$ of conformers I-IV of 4-(4-tritylphenoxy)phthalonitrile.....                                                                                                     | 19 |
| 7. <b>Figure S3.</b> Theoretical radial distribution function $f(r)$ for conformer II and difference $\Delta f(r)$ for conformers I, III, IV.....                                                                               | 20 |
| 8. <b>Table S4.</b> Conditions of the synchronous GED/MS experiment.....                                                                                                                                                        | 20 |

## S1. Synthesis details

### S1-1. Introduction

Among the huge number of phthalocyanines synthesized to date, a special place is occupied by compounds containing trityl groups in their composition. Such phthalocyanines include, among others, 2(3),9(10),16(17),23(24)-tetrakis-(4-tritylphenoxy)phthalocyanine and its complexes with various metals (**1a–1d**). *Scheme 1-1*.

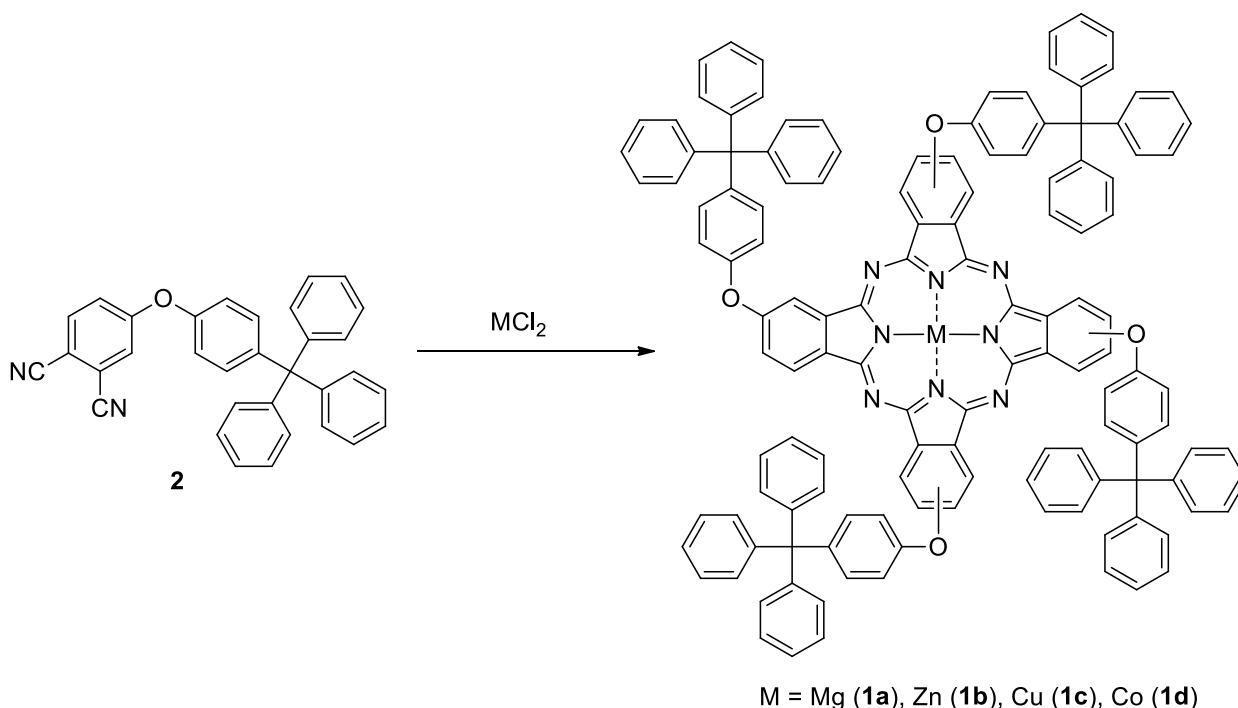

*Scheme 1-1.*

The presence of bulky trityl groups in phthalocyanine and its complexes determines their liquid-crystal properties [1–4]; in addition, these compounds are promising for use in thin-film electronics [5].

The starting compound for the synthesis of phthalocyanines of group (**1**) is 4-(4-tritylphenoxy)phthalonitrile **2**. Here we present the full cycle of its synthesis, consisting of the steps of benzene alkylation with carbon tetrachloride, phenol alkylation with triphenylmethanol, and nucleophilic substitution of the nitro group in 4-nitrophthalonitrile with the 4-tritylphenol. The scheme of chemical transformations is shown in *Scheme SI-2*.

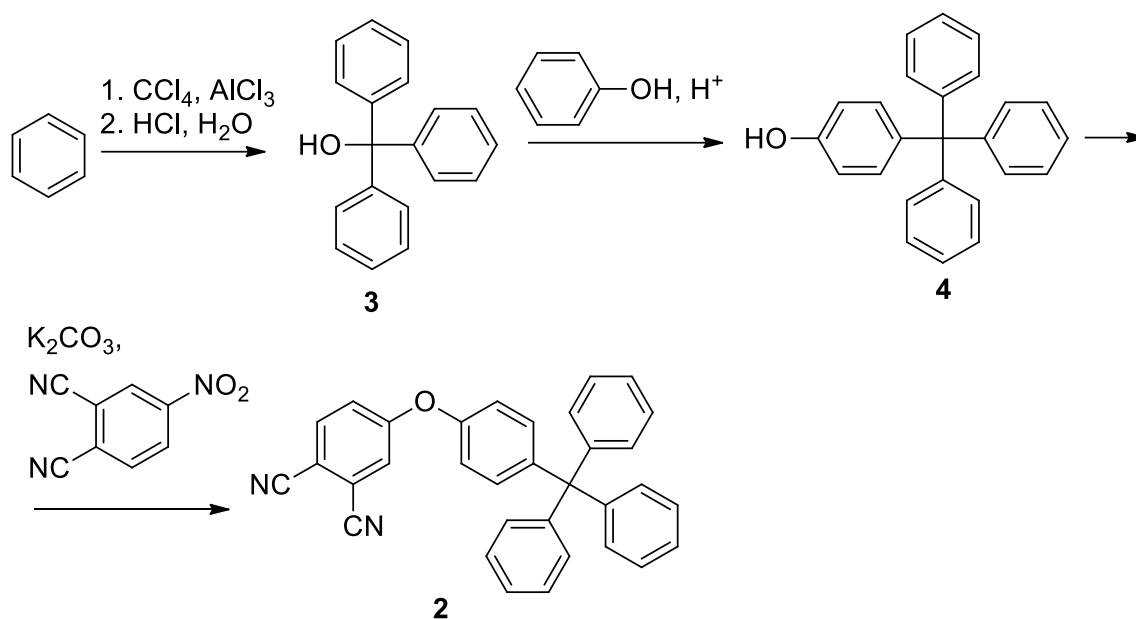

*Scheme S1-2. Synthesis of 4-(4-tritylphenoxy)phthalonitrile **2**.*

The first step in the synthesis is the alkylation of benzene. It is taken in a significant excess relative to carbon tetrachloride to maintain the mobility of the reaction mass. Alkylation yields triphenylchloromethane, which is then hydrolyzed to triphenylmethanol **3** by refluxing with hydrochloric acid. Its yield is about 60%. The unreacted benzene can be distilled off, dried, and reused in the synthesis. At the second stage, alcohol **3** is used for phenol alkylation. The reaction is carried out in an acetic acid medium catalyzed by sulfuric acid; as a result, 4-tritylphenol **4** is formed with a yield of 56%. At the third stage, phenol **4** reacts with 4-nitrophthalonitrile to form target 4-(4-tritylphenoxy)phthalonitrile **2** in 89% yield. The total yield of nitrile **2**, based on the starting carbon tetrachloride, was about 30%. The moderate yield is offset by the availability and low cost of reagents. The composition and structure of compounds **2** – **4** were confirmed by elemental analysis, mass spectra and  $^1\text{H}$  NMR spectra. In addition,  $^{13}\text{C}$  NMR spectrum.

## **S1-2. Experimental section**

### *S1-2.1. Materials and measurements*

Chloroform, tetrachloromethane and benzene of chemical grade by EKOS (<http://www.ekos-1.ru>) were used without further purification. 4-Nitrophthalonitrile were purchased from Aldrich ([www.sigmaaldrich.com](http://www.sigmaaldrich.com)). The silica-gel 60 (0.063–0.200 mm) were from Merck ([www.merck.de](http://www.merck.de)).

Mass spectroscopy measurements in both LDI-TOF (matrix-free) modes were performed with a Shimadzu AXIMA Confidence spectrometer.  $^1\text{H}$  NMR (500.13 MHz) and  $^{13}\text{C}$  NMR (125 MHz) spectra were recorded on a Bruker Avance-500 spectrometer in  $\text{CDCl}_3$ . Spectra were referenced internally by using the residual solvent resonance ( $\delta = 7.28$  ( $^1\text{H}$ ) and 77.09 ( $^{13}\text{C}$ ) ppm for  $\text{CDCl}_3$ ) relative to  $\text{SiMe}_4$  (TMS). Elemental analyses were performed on an FlashEA 1112 CHNS–O elemental analyzer. The infrared spectra were recorded for the films deposited from solution on the KRS-5 slides in the range of 400–4000  $\text{cm}^{-1}$  using an Avatar 360 FT-IR spectrometer.

#### *SI-2.2. Synthesis of triphenylmethanol (3).*

To a mixture of 100.0 g (1.28 mol) of dry benzene and 20.0 g (0.13 mol) of dry carbon tetrachloride was added 20.0 g (0.15 mol) of anhydrous aluminum chloride at room temperature in portions of 5 g over an hour, heated to boiling and kept for another 6 h, after to which 100 ml of 10% hydrochloric acid was added and stirred at the boil for 1 h. The organic layer was separated, benzene and carbon tetrachloride that did not enter into the reaction were distilled off, the residue was recrystallized from propan-2-ol. Yield 20.0 g (58%). White substance, soluble in chloroform, benzene, DMSO. MS (LDI–TOF, negative mode):  $m/z$  259.35 [Calc. for  $[M-\text{H}]^-$ : 259.12]. Another peak:  $m/z$  243.35  $[M-\text{OH}]^-$ .  $^1\text{H}$  NMR ( $\text{CDCl}_3$ ), ppm: 7.43–7.33 (m, 15H, Ar–H), 3.01 s (1H, O–H). Anal. Calc. (%) for  $\text{C}_{19}\text{H}_{16}\text{O}$ : C 87.66, H 6.19. found: C 87.22, H 6.33.

#### *SI-2.3. Synthesis of 4-tritylphenol (4).*

A mixture of 16.0 g (0.06 mol) of compound 3 and 7.0 g (0.07 mol) of phenol was dissolved in 30 ml of acetic acid, 3 ml of concentrated sulfuric acid was added, and refluxed for 10 h. 10% sodium hydroxide solution, 200 ml water, 20 ml acetone, then recrystallized from propan-2-ol. Yield 11.6 g (56%). White substance, soluble in chloroform, benzene, DMSO. MS (LDI–TOF, negative mode):  $m/z$  335.48 [Calc. for  $[M-\text{H}]^-$ : 335.15].  $^1\text{H}$  NMR ( $\text{CDCl}_3$ ), ppm: 7.29–7.26 (m, 6H, Ar–H), 7.23–7.20 (m, 9H, Ar–H), 7.10 (d, 2H,  $J=8.9$  Hz, Ar–H), 6.75 (d, 2H,  $J=8.8$  Hz, Ar–H), 4.72 (br, 1H, O–H). Anal. Calc. (%) for  $\text{C}_{25}\text{H}_{20}\text{O}$ : C 89.25, H 5.99. found: C 89.21, H 6.04.

#### *SI-2.4. Synthesis of 4-(4-tritylphenoxy)phthalonitrile (2).*

A mixture of 2.6 g (0.015 mol) of 4-nitrophthalonitrile, 6.9 g (0.02 mol) of compound **4**, 3.0 g of K<sub>2</sub>CO<sub>3</sub>, and 50 ml of DMF was stirred for 10 h at 110°C, cooled, and poured into 300 ml of water. The precipitate was filtered off, washed with 200 ml of water, dried in air at 80°C, and recrystallized from propan-2-ol. Yield 6.2 g (89%), light yellow substance, soluble in chloroform, benzene, DMSO. R<sub>f</sub> 0.59 (chloroform, Silufol). MS (LDI–TOF, negative mode): m/z 461.96 [Calc. for [M]<sup>−</sup>: 462.17]. <sup>1</sup>H NMR (CDCl<sub>3</sub>), ppm: 7.77 (d, 1H, J=8.7 Hz, Ar–H), 7.37–7.26 (m, 19H, Ar–H), 7.00 (d, 2H, J=8.6 Hz, Ar–H). <sup>13</sup>C NMR (CDCl<sub>3</sub>), ppm: 161.56, 151.50, 146.35, 145.12, 135.46, 133.36, 131.04, 127.73, 126.26, 121.63, 119.35, 117.66, 115.05, 108.92, 64.67. FT–IR spectrum (ν, cm<sup>−1</sup>): 3057(C–H), 2231(C≡N), 1593(C=C), 1566, 1491, 1311, 1249 (Ar–O–Ar), 1213, 1176, 753, 704, 632. Anal. Calc. (%) for C<sub>33</sub>H<sub>22</sub>N<sub>2</sub>O: C 85.68, H 4.80, N 6.06. found: C 85.77, H 4.91, N 5.99.

#### **References**

1. Usol'tseva N., Bykova V., Ananjeva G., Zharnikova N., Kudrik E. Mesomorphism and Glass Formation of Phthalocyanine Metal Complexes with Bulky Substituents. *Mol. Cryst. Liq. Cryst.*, 2004. Vol. 411, pp. 329–336 (<https://doi.org/10.1080/15421400490435350>).
2. Zharnikova N., Usol'tseva N., Kudrik E., Thelakkat M. Synthesis, mesomorphism and electrochemical properties of tetrasubstituted zinc and copper phthalocyanines. *J. Mater. Chem.*, 2009, 19, 3161–3167 (do <https://doi.org/10.1039/b821306b>).
3. Nakamura H., Sugiyama K., Ohta K., Yasutake M. Phthalocyanine-based discotic liquid crystals switching from a molten alkyl chain type to a flying-seed-like type. *J. Mater. Chem. C*, 2017, 5, 7297–7306 (<https://doi.org/10.1039/c7tc01197k>).
4. Takagi Y., Ohta K., Shimosugi S., Fujii T., Itoh E. Flying-seed-like liquid crystals 2: unprecedented guidelines to obtain liquid crystalline compounds. *J. Mater. Chem.*, **2012**, 22, 14418–14425. <https://doi.org/10.1039/c2jm32284f>.
5. Solgun D.G., Horoz S., Agirtas M.S. Synthesis of novel tetra(4-tritylphenoxy)substituted metallophthalocyanines and investigation of their aggregation, photovoltaic, solar cell properties. *Inorganic and Nano-Metal Chemistry*. 2018. 48:10, 508–514 (<https://doi.org/10.1080/24701556.2019.1572624>).

**Table S1.** Selected characteristics of 4-(4-tritylphenoxy)phthalonitrile molecule according to DFT calculations<sup>1</sup>

|                                                                                                        | B97D/cc-pVTZ     |       |       |       | CAM-B3LYP/cc-pVTZ |       |       |       | PBE/cc-pVTZ      |       |       |       |
|--------------------------------------------------------------------------------------------------------|------------------|-------|-------|-------|-------------------|-------|-------|-------|------------------|-------|-------|-------|
|                                                                                                        | <i>conformer</i> |       |       |       | <i>conformer</i>  |       |       |       | <i>conformer</i> |       |       |       |
|                                                                                                        | I                | II    | III   | IV    | I                 | II    | III   | IV    | I                | II    | III   | IV    |
| $\Delta E_{\text{total}}$ , kcal/mol                                                                   | 0.428            | 0     | 0.828 | 0.496 | 0.122             | 0     | 0.345 | 0.266 | 0.129            | 0     | 0.371 | 0.308 |
| $E_{\text{HOMO}}$ , eV                                                                                 | -5.82            | -5.84 | -5.90 | -5.90 | -8.16             | -8.16 | -8.26 | -8.23 | -6.99            | -6.99 | -7.09 | -7.06 |
| $E_{\text{LUMO}}$ , eV                                                                                 | -2.95            | -2.91 | -2.92 | -2.88 | -1.13             | -1.11 | -1.04 | -1.03 | -2.21            | -2.20 | -2.13 | -2.13 |
| $\mu$ , D                                                                                              | 8.18             | 7.72  | 9.92  | 10.02 | 8.04              | 7.97  | 9.98  | 9.98  | 8.09             | 8.04  | 10.05 | 10.04 |
| Parameters of a distorted tetrahedron CC <sub>4</sub> built from carbon atoms of four phenyl fragments |                  |       |       |       |                   |       |       |       |                  |       |       |       |
| C-C <sup>2</sup>                                                                                       | 1.548            | 1.548 | 1.548 | 1.549 | 1.546             | 1.546 | 1.546 | 1.546 | 1.542            | 1.542 | 1.542 | 1.542 |
| C-C-C <sup>3</sup>                                                                                     | 113.3            | 113.4 | 113.3 | 113.3 | 111.4             | 111.5 | 111.3 | 111.5 | 111.3            | 111.5 | 111.2 | 111.4 |
| C-C-C <sup>4</sup>                                                                                     | 102.0            | 102.0 | 102.0 | 102.0 | 105.6             | 105.4 | 105.9 | 105.5 | 106.0            | 105.6 | 106.0 | 105.7 |
| Parameters of Ph-O-PhN moiety                                                                          |                  |       |       |       |                   |       |       |       |                  |       |       |       |
| C <sub>Ph</sub> -O                                                                                     | 1.403            | 1.404 | 1.400 | 1.401 | 1.389             | 1.389 | 1.388 | 1.388 | 1.386            | 1.386 | 1.385 | 1.385 |
| O-C <sub>PhN</sub>                                                                                     | 1.364            | 1.365 | 1.364 | 1.365 | 1.352             | 1.352 | 1.352 | 1.353 | 1.350            | 1.350 | 1.350 | 1.350 |
| C-C <sup>5</sup>                                                                                       | 1.397            | 1.396 | 1.397 | 1.397 | 1.385             | 1.385 | 1.385 | 1.385 | 1.387            | 1.387 | 1.388 | 1.387 |
| C-C <sup>6</sup>                                                                                       | 1.403            | 1.404 | 1.403 | 1.403 | 1.388             | 1.388 | 1.388 | 1.388 | 1.392            | 1.392 | 1.391 | 1.391 |
| C <sub>8</sub> -C <sub>9</sub> <sup>2</sup>                                                            | 1.428            | 1.428 | 1.428 | 1.428 | 1.429             | 1.429 | 1.429 | 1.429 | 1.425            | 1.425 | 1.425 | 1.425 |
| C $\equiv$ N                                                                                           | 1.163            | 1.163 | 1.163 | 1.163 | 1.145             | 1.145 | 1.145 | 1.145 | 1.152            | 1.152 | 1.152 | 1.152 |
| C <sub>PhN</sub> -O-C <sub>Ph</sub>                                                                    | 118.7            | 117.6 | 119.8 | 118.8 | 119.9             | 119.8 | 120.0 | 120.0 | 119.2            | 119.2 | 119.5 | 119.4 |
| C-C-C <sup>5</sup>                                                                                     | 120.0            | 120.0 | 120.0 | 120.0 | 120.0             | 120.0 | 120.0 | 120.0 | 120.0            | 120.0 | 120.0 | 120.0 |
| C-C-C <sup>6</sup>                                                                                     | 120.0            | 120.0 | 120.0 | 120.0 | 120.0             | 120.0 | 120.0 | 120.0 | 120.0            | 120.0 | 120.0 | 120.0 |
| Parameters of trityl group                                                                             |                  |       |       |       |                   |       |       |       |                  |       |       |       |
| C-C <sup>7</sup>                                                                                       | 1.398            | 1.399 | 1.398 | 1.398 | 1.386             | 1.386 | 1.386 | 1.386 | 1.389            | 1.389 | 1.389 | 1.389 |
| C-C <sup>7</sup>                                                                                       | 1.399            | 1.399 | 1.399 | 1.399 | 1.386             | 1.386 | 1.386 | 1.386 | 1.389            | 1.389 | 1.389 | 1.389 |
| C-C <sup>7</sup>                                                                                       | 1.399            | 1.399 | 1.399 | 1.399 | 1.386             | 1.386 | 1.386 | 1.386 | 1.389            | 1.389 | 1.389 | 1.389 |
| C-C-C <sup>7</sup>                                                                                     | 120.0            | 120.0 | 120.0 | 120.0 | 120.0             | 120.0 | 120.0 | 120.0 | 120.0            | 120.0 | 120.0 | 120.0 |
| C-C-C <sup>7</sup>                                                                                     | 120.0            | 120.0 | 120.0 | 120.0 | 120.0             | 120.0 | 120.0 | 120.0 | 120.0            | 120.0 | 120.0 | 120.0 |
| C-C-C <sup>7</sup>                                                                                     | 120.0            | 120.0 | 120.0 | 120.0 | 120.0             | 120.0 | 120.0 | 120.0 | 120.0            | 120.0 | 120.0 | 120.0 |

<sup>1</sup> distances in Å, bond angles in deg.; see Fig. 1 for numbering atoms, <sup>2</sup> averaged, <sup>3</sup> averaged value of four angles, <sup>4</sup> averaged value of two angles, <sup>5</sup> the average value in the PhO fragment, <sup>6</sup> the average value in the PhN fragment, <sup>7</sup> the average value in the phenyl ring

**Table S2.** Relative Gibbs energies ( $\Delta G^0_{478}$ , kcal/mol), and molar fractions  $\chi_i$  of conformers (mol%) in saturated vapor calculated for T=478K according to DFT calculations<sup>1</sup>

|       | I-IV<br>forms | $\Delta G^0_{478}$ | $\chi_i$ |               | I-IV<br>forms | $\Delta G^0_{478}$ | $\chi_i$ |
|-------|---------------|--------------------|----------|---------------|---------------|--------------------|----------|
| B3LYP | I             | 0.28               | 29.1     | CAM-<br>B3LYP | I             |                    | 27.3     |
|       | II            | 0.76               | 17.6     |               | II            | 0.65               | 18.9     |
|       | III           | 0.95               | 14.3     |               | III           | 0.80               | 16.2     |
|       | IV            | 0.0                | 39.0     |               | IV            | 0.0                | 37.6     |
| B97D  | I             | 0.0                | 39.5     | PBE           | I             | 0.69               | 21.6     |
|       | II            | 0.74               | 18.1     |               | II            | 0.85               | 18.4     |
|       | III           | 1.46               | 8.5      |               | III           | 1.04               | 15.0     |
|       | IV            | 0.15               | 33.9     |               | IV            | 0.0                | 45.0     |

<sup>1</sup> basis set cc-pVTZ

**Table S3.** Theoretical ( $\omega_{\text{theor}}$ ) vibrations frequencies of conformers and experimental ( $\nu_{\text{exp}}$ ) of 4-(4-tritylphenoxy)phthalonitrile. No scaled theoretical frequencies are given.

| Symmetry | $\omega_{\text{theor}}, \text{cm}^{-1}$ |      |      |      | $\nu_{\text{exp}}, \text{cm}^{-1}$ | Normal vibrational energy distribution in internal coordinates for <i>cis</i> -conformer II                                                                                                                                                                                                                                                                                                                                                                                        |
|----------|-----------------------------------------|------|------|------|------------------------------------|------------------------------------------------------------------------------------------------------------------------------------------------------------------------------------------------------------------------------------------------------------------------------------------------------------------------------------------------------------------------------------------------------------------------------------------------------------------------------------|
|          | I                                       | II   | III  | IV   |                                    |                                                                                                                                                                                                                                                                                                                                                                                                                                                                                    |
| A        | 3224                                    | 3224 | 3217 | 3218 |                                    | $\nu(\text{C}_{\text{PhN}}\text{-H})$                                                                                                                                                                                                                                                                                                                                                                                                                                              |
| A        | 3218                                    | 3218 | 3217 | 3217 |                                    | $\nu(\text{C}_{\text{Ph}}\text{-H})$                                                                                                                                                                                                                                                                                                                                                                                                                                               |
| A        | 3215                                    | 3214 | 3215 | 3214 | 3083.84                            | $\nu(\text{C}_{\text{thr}}\text{-H})$                                                                                                                                                                                                                                                                                                                                                                                                                                              |
| A        | 3215                                    | 3214 | 3214 | 3214 |                                    | $\nu(\text{C}_{\text{thr}}\text{-H})$                                                                                                                                                                                                                                                                                                                                                                                                                                              |
| A        | 3212                                    | 3211 | 3213 | 3213 |                                    | $\nu(\text{C}_{\text{thr}}\text{-H})$                                                                                                                                                                                                                                                                                                                                                                                                                                              |
| A        | 3210                                    | 3210 | 3213 | 3211 |                                    | $\nu(\text{C}_{\text{PhN}}\text{-H})$                                                                                                                                                                                                                                                                                                                                                                                                                                              |
| A        | 3198                                    | 3198 | 3199 | 3199 |                                    | $\nu(\text{C}_{\text{Ph}}\text{-H})$                                                                                                                                                                                                                                                                                                                                                                                                                                               |
| A        | 3197                                    | 3197 | 3197 | 3198 |                                    | $\nu(\text{C}_{\text{PhN}}\text{-H})$                                                                                                                                                                                                                                                                                                                                                                                                                                              |
| A        | 3192                                    | 3193 | 3193 | 3192 |                                    | $\nu(\text{C}_{\text{thr}}\text{-H})$                                                                                                                                                                                                                                                                                                                                                                                                                                              |
| A        | 3192                                    | 3192 | 3192 | 3192 |                                    | $\nu(\text{C}_{\text{thr}}\text{-H})$                                                                                                                                                                                                                                                                                                                                                                                                                                              |
| A        | 3192                                    | 3191 | 3191 | 3191 |                                    | $\nu(\text{C}_{\text{thr}}\text{-H}), \nu(\text{C}_{\text{Ph}}\text{-H})$                                                                                                                                                                                                                                                                                                                                                                                                          |
| A        | 3190                                    | 3190 | 3190 | 3190 |                                    | $\nu(\text{C}_{\text{Ph}}\text{-H})_{\text{Ph}}, \nu(\text{C}_{\text{thr}}\text{-H})$                                                                                                                                                                                                                                                                                                                                                                                              |
| A        | 3185                                    | 3185 | 3185 | 3184 | 3056.83                            | $\nu(\text{C}_{\text{thr}}\text{-H}), \nu(\text{C}_{\text{Ph}}\text{-H})$                                                                                                                                                                                                                                                                                                                                                                                                          |
| A        | 3184                                    | 3183 | 3183 | 3183 |                                    | $\nu(\text{C-H})_{\text{Ph}}, \nu(\text{C}_{\text{thr}}\text{-H})$                                                                                                                                                                                                                                                                                                                                                                                                                 |
| A        | 3183                                    | 3183 | 3183 | 3183 |                                    | $\nu(\text{C}_{\text{thr}}\text{-H}), \nu(\text{C}_{\text{Ph}}\text{-H})$                                                                                                                                                                                                                                                                                                                                                                                                          |
| A        | 3183                                    | 3183 | 3182 | 3181 |                                    | $\nu(\text{C}_{\text{thr}}\text{-H}), \nu(\text{C}_{\text{Ph}}\text{-H})_{\text{Ph}}$                                                                                                                                                                                                                                                                                                                                                                                              |
| A        | 3174                                    | 3173 | 3173 | 3173 |                                    | $\nu(\text{C}_{\text{thr}}\text{-H})$                                                                                                                                                                                                                                                                                                                                                                                                                                              |
| A        | 3172                                    | 3172 | 3172 | 3172 |                                    | $\nu(\text{C}_{\text{thr}}\text{-H})$                                                                                                                                                                                                                                                                                                                                                                                                                                              |
| A        | 3172                                    | 3172 | 3172 | 3171 |                                    | $\nu(\text{C}_{\text{thr}}\text{-H})$                                                                                                                                                                                                                                                                                                                                                                                                                                              |
| A        | 3165                                    | 3165 | 3164 | 3164 |                                    | $\nu(\text{C}_{\text{thr}}\text{-H})$                                                                                                                                                                                                                                                                                                                                                                                                                                              |
| A        | 3164                                    | 3164 | 3164 | 3164 |                                    | $\nu(\text{C}_{\text{thr}}\text{-H})$                                                                                                                                                                                                                                                                                                                                                                                                                                              |
| A        | 3164                                    | 3164 | 3163 | 3163 |                                    | $\nu(\text{C}_{\text{thr}}\text{-H})$                                                                                                                                                                                                                                                                                                                                                                                                                                              |
| A        | 2344                                    | 2344 | 2345 | 2345 |                                    | $\nu(\text{N-C}_{\text{N}}), \nu(\text{C}_{\text{PhN}}\text{-C}_{\text{N}})$                                                                                                                                                                                                                                                                                                                                                                                                       |
| A        | 2338                                    | 2338 | 2338 | 2338 | 2233.25                            | $\nu(\text{N-C}_{\text{N}}), \nu(\text{C}_{\text{PhN}}\text{-C}_{\text{N}})$                                                                                                                                                                                                                                                                                                                                                                                                       |
| A        | 1649                                    | 1649 | 1651 | 1650 |                                    | $\nu(\text{C-C})_{\text{ring-all}}, \delta(\text{CCC})_{\text{ring-all}}, \delta(\text{CCH})_{\text{ring-all}}$                                                                                                                                                                                                                                                                                                                                                                    |
| A        | 1644                                    | 1644 | 1645 | 1645 |                                    | $\nu(\text{C}_{\text{Ph}}\text{-C}_{\text{Ph}})_{\text{ring}}, \nu(\text{C}_{\text{thr}}\text{-C}_{\text{thr}})_{\text{ring}}, \delta(\text{CCC})_{\text{ring-all}}, \delta(\text{C}_{\text{thr}}\text{C}_{\text{thr}}\text{H})$                                                                                                                                                                                                                                                   |
| A        | 1640                                    | 1641 | 1641 | 1641 |                                    | $\nu(\text{C}_{\text{thr}}\text{-C}_{\text{thr}})_{\text{ring}}, \delta(\text{C}_{\text{thr}}\text{C}_{\text{thr}}\text{C}_{\text{thr}})_{\text{ring}}, \delta(\text{C}_{\text{thr}}\text{C}_{\text{thr}}\text{H})$                                                                                                                                                                                                                                                                |
| A        | 1640                                    | 1640 | 1640 | 1640 |                                    | $\nu(\text{C}_{\text{thr}}\text{-C}_{\text{thr}})_{\text{ring}}, \delta(\text{C}_{\text{thr}}\text{C}_{\text{thr}}\text{C}_{\text{thr}})_{\text{ring}}, \delta(\text{C}_{\text{thr}}\text{C}_{\text{thr}}\text{H})$                                                                                                                                                                                                                                                                |
| A        | 1631                                    | 1631 | 1633 | 1633 | 1592.9                             | $\nu(\text{C}_{\text{PhN}}\text{-C}_{\text{PhN}})_{\text{ring}}, \nu(\text{C}_{\text{Ph}}\text{-C}_{\text{Ph}})_{\text{ring}}, \delta(\text{OC}_{\text{PhN}}\text{C}_{\text{PhN}}), \delta(\text{CCC})_{\text{ring-all}}, \delta(\text{CCH})_{\text{ring-all}}$                                                                                                                                                                                                                    |
| A        | 1626                                    | 1626 | 1626 | 1626 |                                    | $\nu(\text{C}_{\text{thr}}\text{-C}_{\text{thr}})_{\text{ring}}, \nu(\text{C}_{\text{Ph}}\text{-C}_{\text{Ph}})_{\text{ring}}, \delta(\text{CCC})_{\text{ring-all}}, \delta(\text{CCH})_{\text{ring-all}}$                                                                                                                                                                                                                                                                         |
| A        | 1621                                    | 1621 | 1621 | 1621 |                                    | $\nu(\text{C}_{\text{thr}}\text{-C}_{\text{thr}})_{\text{ring}}, \delta(\text{CCC})_{\text{C4}}, \delta(\text{C}_{\text{thr}}\text{C}_{\text{thr}}\text{C}_{\text{thr}})_{\text{ring}}, \delta(\text{C}_{\text{thr}}\text{C}_{\text{thr}}\text{H})$                                                                                                                                                                                                                                |
| A        | 1621                                    | 1621 | 1621 | 1621 |                                    | $\nu(\text{C}_{\text{Ph}}\text{-C}_{\text{Ph}})_{\text{ring}}, \nu(\text{C}_{\text{thr}}\text{-C}_{\text{thr}})_{\text{ring}}, \delta(\text{C}_{\text{thr}}\text{C}_{\text{thr}}\text{C}_{\text{thr}})_{\text{ring}}, \delta(\text{C}_{\text{thr}}\text{C}_{\text{thr}}\text{H}), \delta(\text{C}_{\text{Ph}}\text{C}_{\text{Ph}}\text{C}_{\text{Ph}})_{\text{ring}}, \delta(\text{C}_{\text{Ph}}\text{C}_{\text{Ph}}\text{H})$                                                    |
| A        | 1620                                    | 1619 | 1620 | 1619 |                                    | $\nu(\text{C}_{\text{Ph}}\text{-C}_{\text{Ph}})_{\text{ring}}, \nu(\text{C}_{\text{thr}}\text{-C}_{\text{thr}})_{\text{ring}}, \delta(\text{C}_{\text{thr}}\text{C}_{\text{thr}}\text{C}_{\text{thr}})_{\text{ring}}, \delta(\text{C}_{\text{thr}}\text{C}_{\text{thr}}\text{H}), \delta(\text{C}_{\text{Ph}}\text{C}_{\text{Ph}}\text{C}_{\text{Ph}})_{\text{ring}}, \delta(\text{C}_{\text{Ph}}\text{C}_{\text{Ph}}\text{H}), \delta(\text{OC}_{\text{Ph}}\text{C}_{\text{Ph}})$ |
| A        | 1596                                    | 1596 | 1593 | 1593 |                                    | $\nu(\text{C}_{\text{PhN}}\text{-C}_{\text{PhN}})_{\text{ring}}, \delta(\text{C}_{\text{Ph}}\text{C}_{\text{Ph}}\text{C}_{\text{Ph}})_{\text{ring}}, \delta(\text{C}_{\text{Ph}}\text{C}_{\text{Ph}}\text{H}),$                                                                                                                                                                                                                                                                    |

























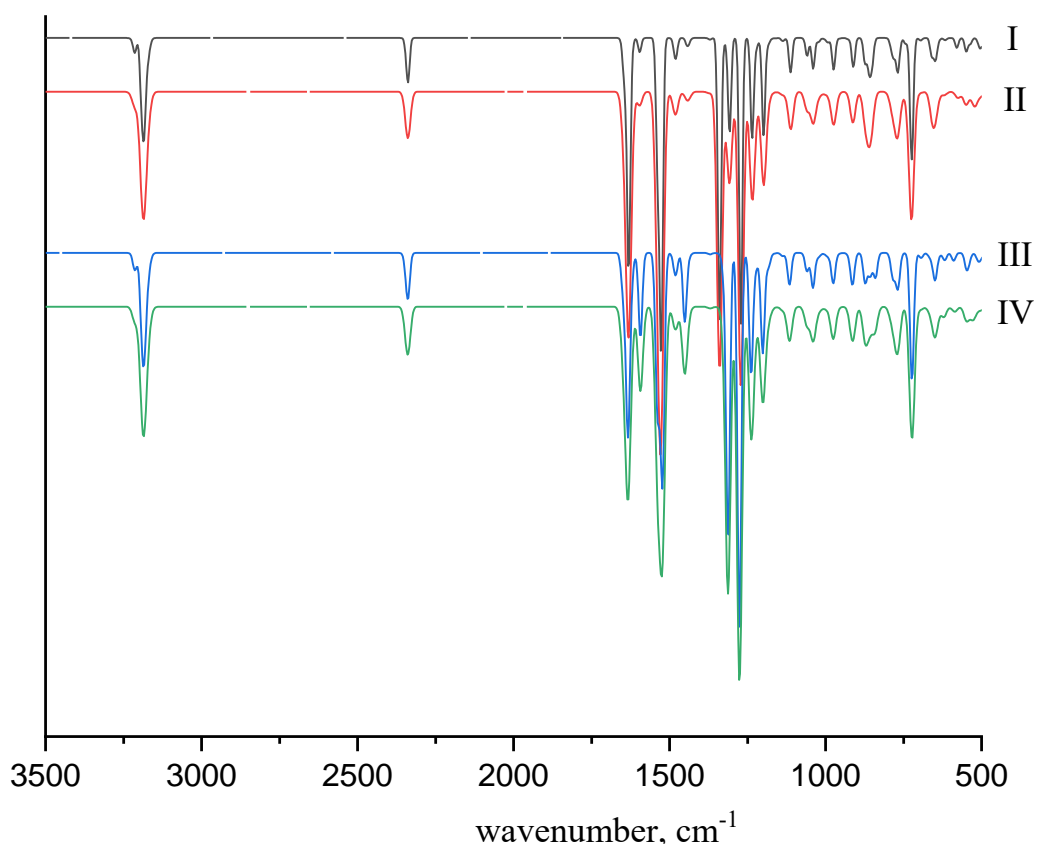

**Figure S1.** The calculated IR spectra of the conformers I and II (*cis*) and III and IV (*trans*)

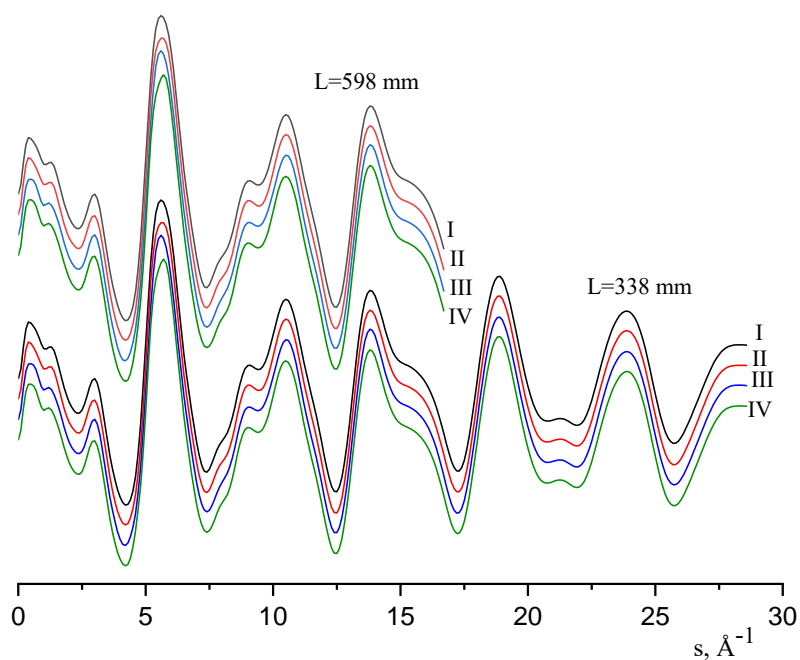

**Figure S2.** Theoretical molecular intensities  $sM(s)$  of conformers I-IV of 4-(4-tritylphenoxy)phthalonitrile.

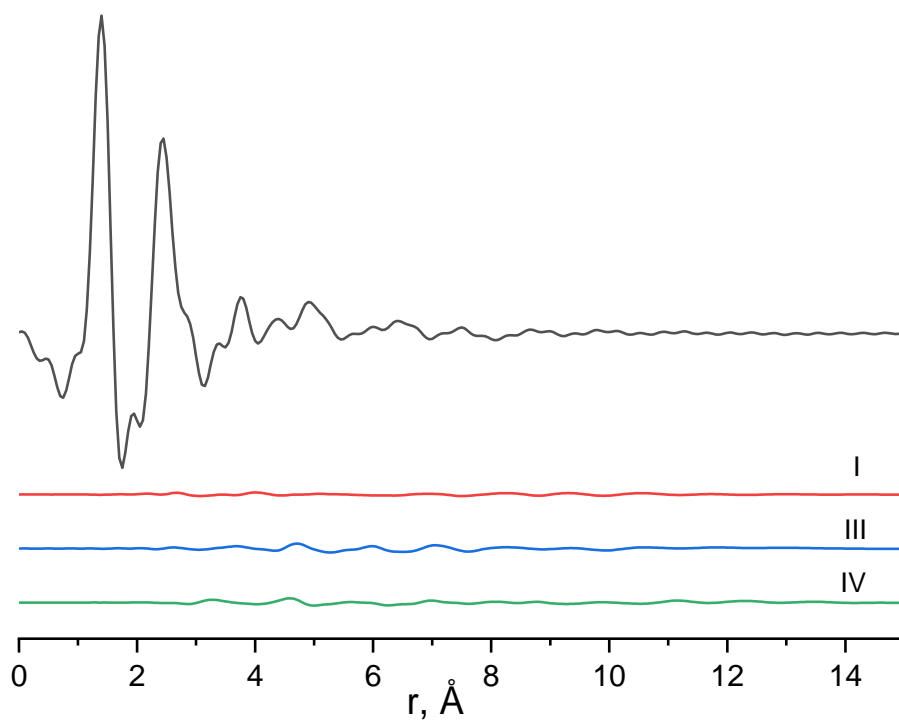

**Figure S3.** Theoretical radial distribution function  $f(r)$  for conformer II and difference  $\Delta f(r)$  for conformers I, III IV.

**Table S4.** Conditions of the synchronous GED/MS experiment.

|                                                    |                     |                     |
|----------------------------------------------------|---------------------|---------------------|
| Nozzle-to plate distances, mm                      | 338                 | 598                 |
| Number of recorded plates                          | 5                   | 6                   |
| Electron beam current, $\mu\text{A}$               | 1.6                 | 1.2                 |
| Wavelength of electrons, $\text{\AA}$              | 0.04020(3)          | 0.04009(3)          |
| Temperature of the effusion cell, K                | 475(10)             | 481(10)             |
| Average exposure time, s                           | 130                 | 70                  |
| Residual gas pressure in diffraction chamber, Torr | $1.0 \cdot 10^{-6}$ | $1.5 \cdot 10^{-6}$ |
| s-range/ $\Delta s$ , $\text{\AA}^{-1}$            | 3.0-28.6/0.1        | 1.3-16.7/0.1        |
| Ionization voltage, V                              | 50                  | 50                  |
